# Supplementary material for: Polylactide (PLA) Filaments a Biobased Solution for Additive Manufacturing: Correlating Rheology and Thermomechanical Properties with Printing Quality
Source: MDPI journal article supplement (doi:10.3390/ma11071191), 2018-07-11
Supplement: s1 [file s1]

# Supplementary materials

## Appendix A

### Estimation of the true shear rate at the wall nozzle during FDM

The nozzle can be assumed as a capillary with length  $L_n = 1.35$  mm and diameter  $D_n = 0.4$  mm. The apparent shear rate at the wall ( $\dot{\gamma}_w^{app}$ ), i.e., the shear rate in case of Newtonian fluids, can be expressed as:

$$\dot{\gamma}_w^{app} = \frac{32Q}{\pi D_n^3} \quad (1)$$

$Q$  is the volume flow rate, which can be written in terms of filament diameter ( $D_f$ ) and feeding velocity ( $v_f$ ) as:

$$Q = \frac{\pi D_f^2}{4} v_f \quad (2)$$

Substituting Eq. A.2 into Eq. A.1, and assuming  $D_f = 2$  mm (check) and  $v_f = 40$  mm/s, we get  $\dot{\gamma}_w^{app} \sim 2 \times 10^4$  1/s. This value needs to be corrected to account for the non-Newtonian feature of the fluid. For PLA, a power-law behavior ( $\eta \sim \dot{\gamma}^{n-1}$ ,  $n$  being the flow index) can be assumed [20]. In such cases, the Mooney-Rabinowitsch correction provides the following simple expression for the true shear rate:

$$\dot{\gamma}_w^{true} = \frac{3n + 1}{4n} \dot{\gamma}_w^{app} \quad (3)$$

Substituting  $n = 0.25$  as found through capillary rheometer experiments, the shear rate at the nozzle wall is  $\dot{\gamma}_w^{true} \sim 3.6 \times 10^5$  1/s.

## Appendix B

### Statistical analysis

DOE analysis was set on the categorical factor filament type as reported below

| Categorical Factor: Filament |       |
|------------------------------|-------|
| <b>Level 1</b>               | White |
| <b>Level 2</b>               | Black |
| <b>Level 3</b>               | Green |

The responses were the ultimate tensile strength and the Young modulus (UTS)

| Responses  |                           |       |
|------------|---------------------------|-------|
| <b>E</b>   | Ultimate Tensile Strength | [MPa] |
| <b>UTS</b> | Young Modulus             | [GPa] |

The residual analysis for the response E is reported below

### Residual analysis for Response E

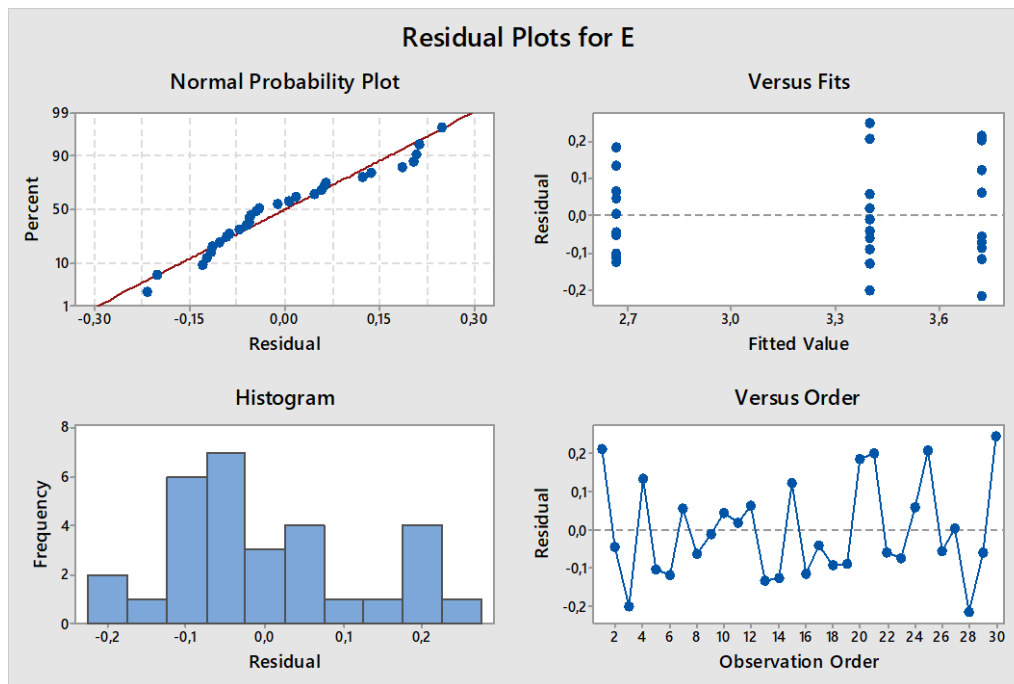

The graphs show that: the error distribution is symmetric and that only small deviations from normal distribution are observed. The graph of residual versus observation order show no residual correlation. The variance is homogenous

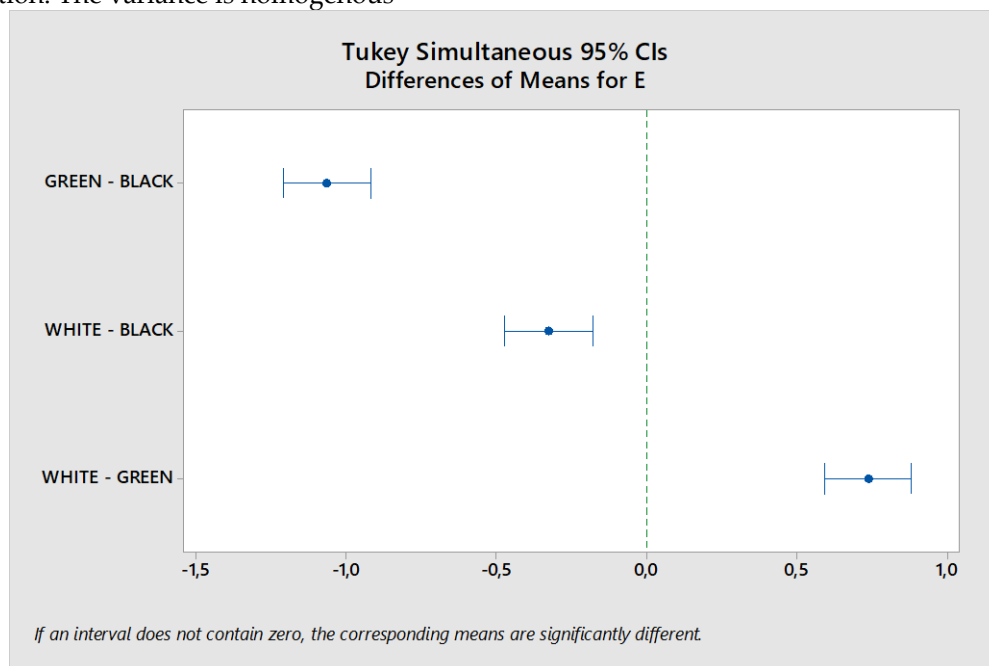

**Figure S1.** Tukey Simultaneous 95% CIs Difference of Means for E.

The residual analysis for the response UTS is reported below

## Residual analysis for Response UTS

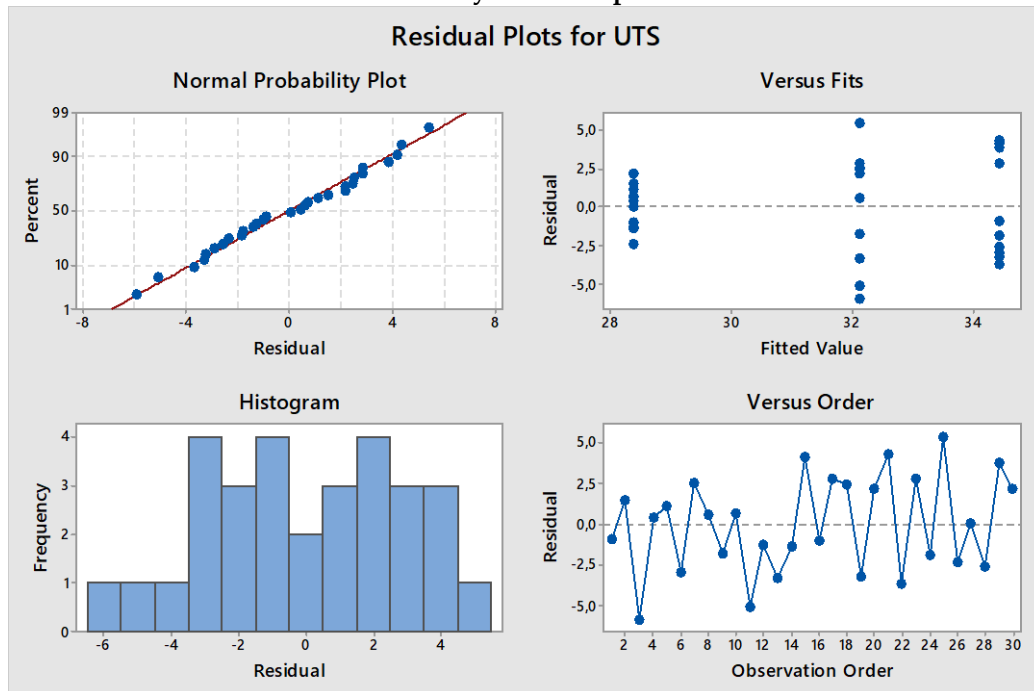

The graphs show that: the error distribution is symmetric and that only small deviations from normal distribution are observed. The graph of residual versus observation order shows no residual correlation. The variance is homogenous.

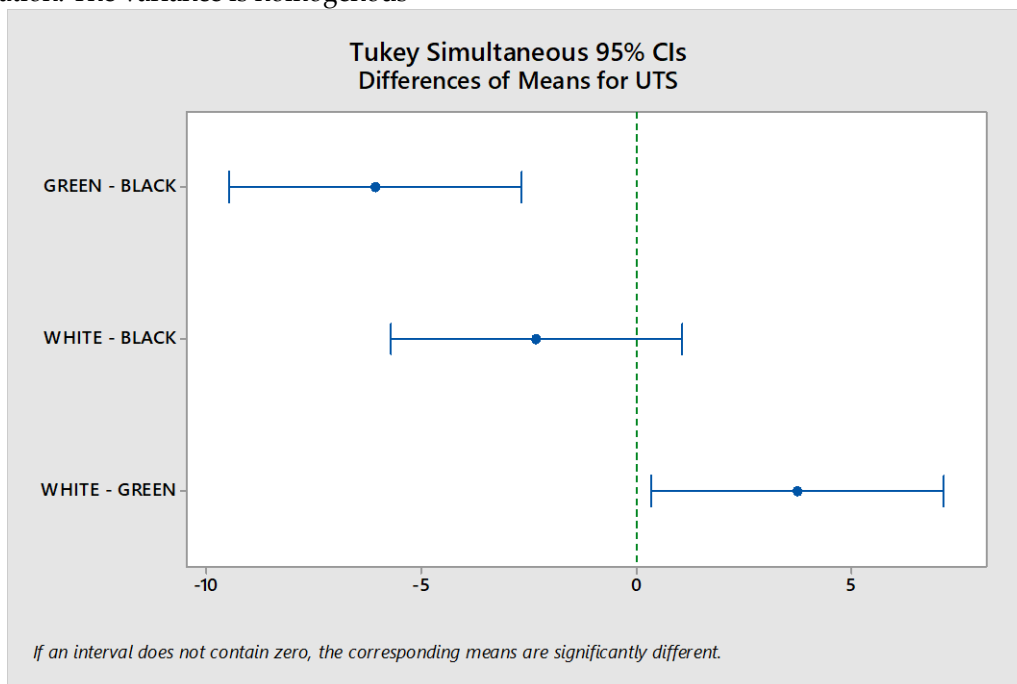

**Figure S2.** Tukey Simultaneous 95% CIs Difference of Means for UTS.
